# Supplementary material for: Predictive modelling of linear growth faltering among pediatric patients with Diarrhea in Rural Western Kenya: an explainable machine learning approach
Source: Springer Nature journal article supplement (doi:10.1186/s12911-024-02779-7), 2024-12-02
Supplement: MOESM1 [file 12911_2024_2779_MOESM1_ESM.pdf]

## Supplemental Materials

Figure S1. Histogram comparison for each predictor variable comparing the aggregate demographic characteristics of the original training dataset (n = 1,473) against synthetic dataset (n = 8,527).

Figure S2. Feature selection for linear growth faltering (delta\_haz/month) among children aged < 5 years presenting with moderate to severe diarrhea in rural western Kenya, 2015-2018

Figure S3. Receiver operating characteristic curve for linear growth faltering prediction models

Table S1. Statistical analysis comparing synthetic data tables to the original training dataset (n = 8,527)

Table S2. Model performance of line

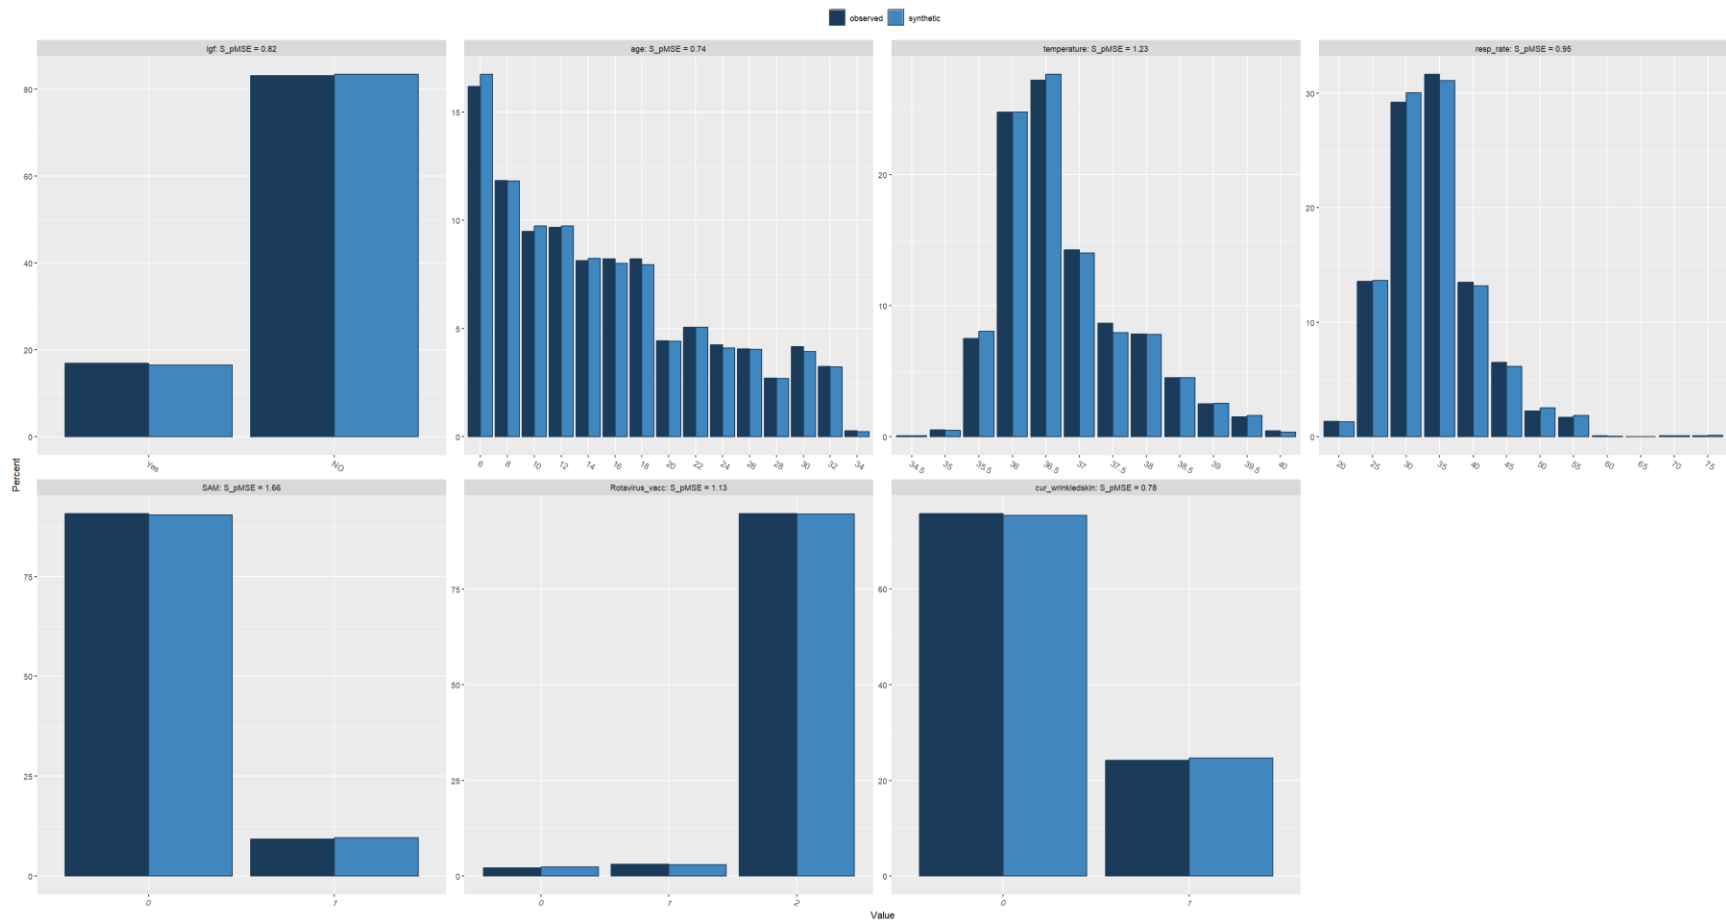

Figure S1. Histogram comparison for each predictor variable comparing the aggregate demographic characteristics of the original training dataset (n = 1,473) against synthetic dataset (n = 8,894).

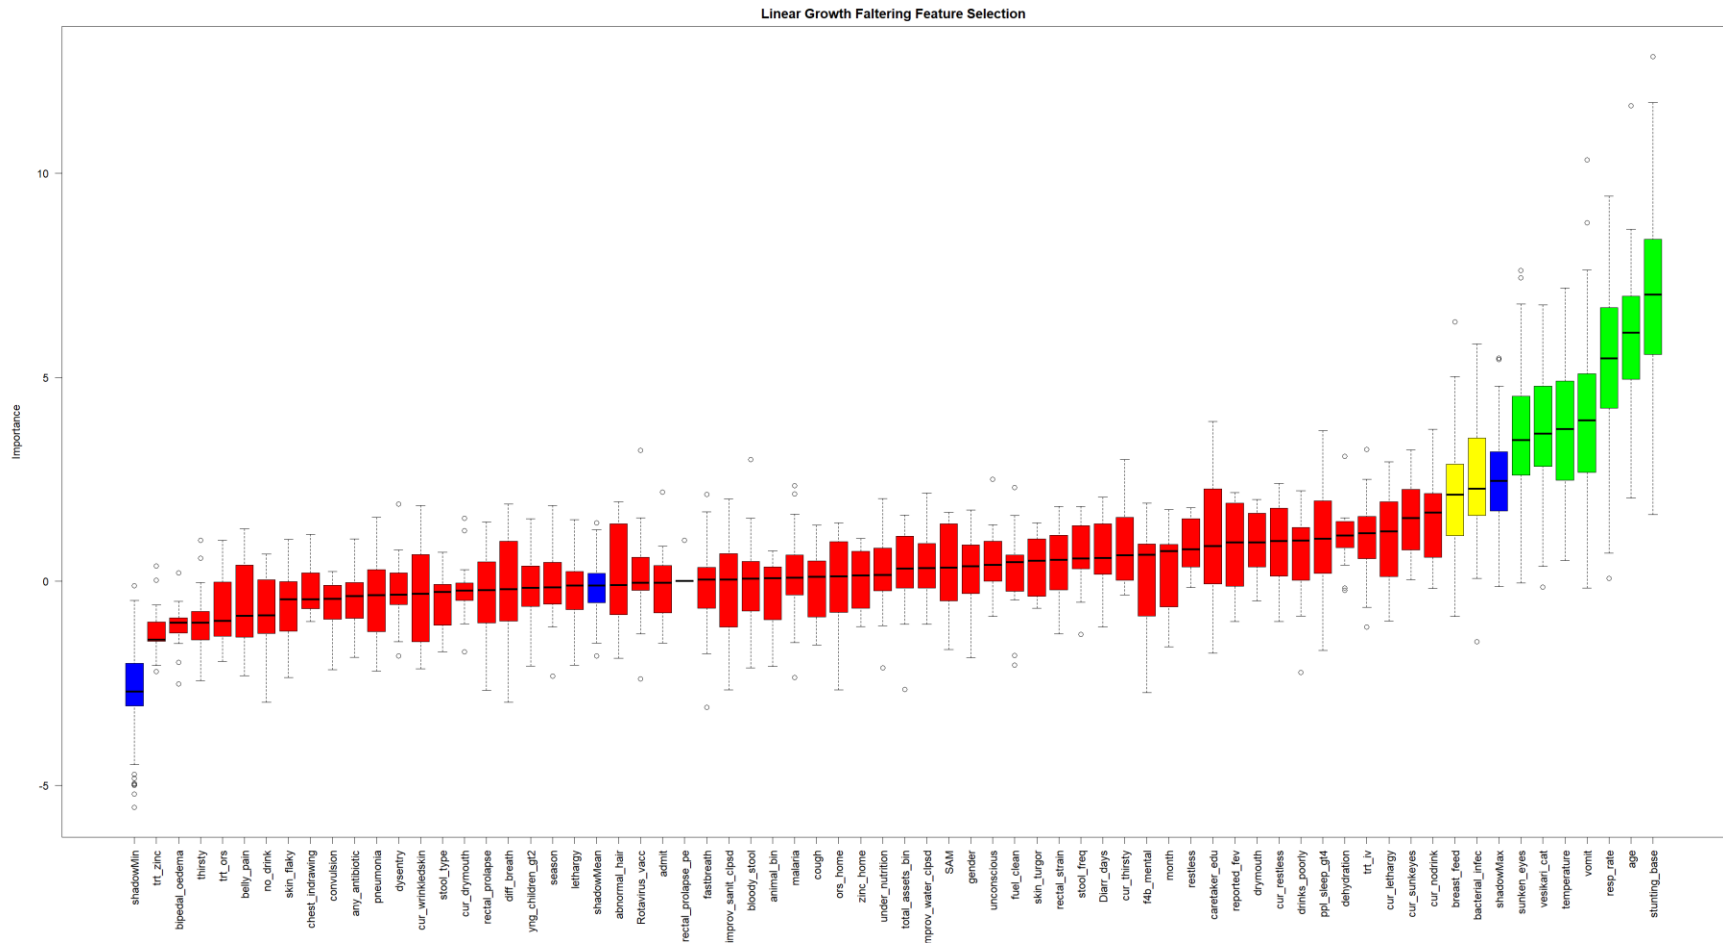

Green, yellow, red and blue boxplots represent the Z scores of confirmed, tentative, rejected and shadow features, respectively.  
 Confirmed and tentative features: *stunting at baseline*; *age*; *respiratory rate*; *vomit*; *temperature*; *vesikari\_cat*; *sunken eyes*; *bacterial infection*; *breastfeeding*.

Figure S2. Feature selection for linear growth filtering (delta\_haz/month) among children aged < 5 years presenting with moderate to severe diarrhea in rural western Kenya, 2015-2018

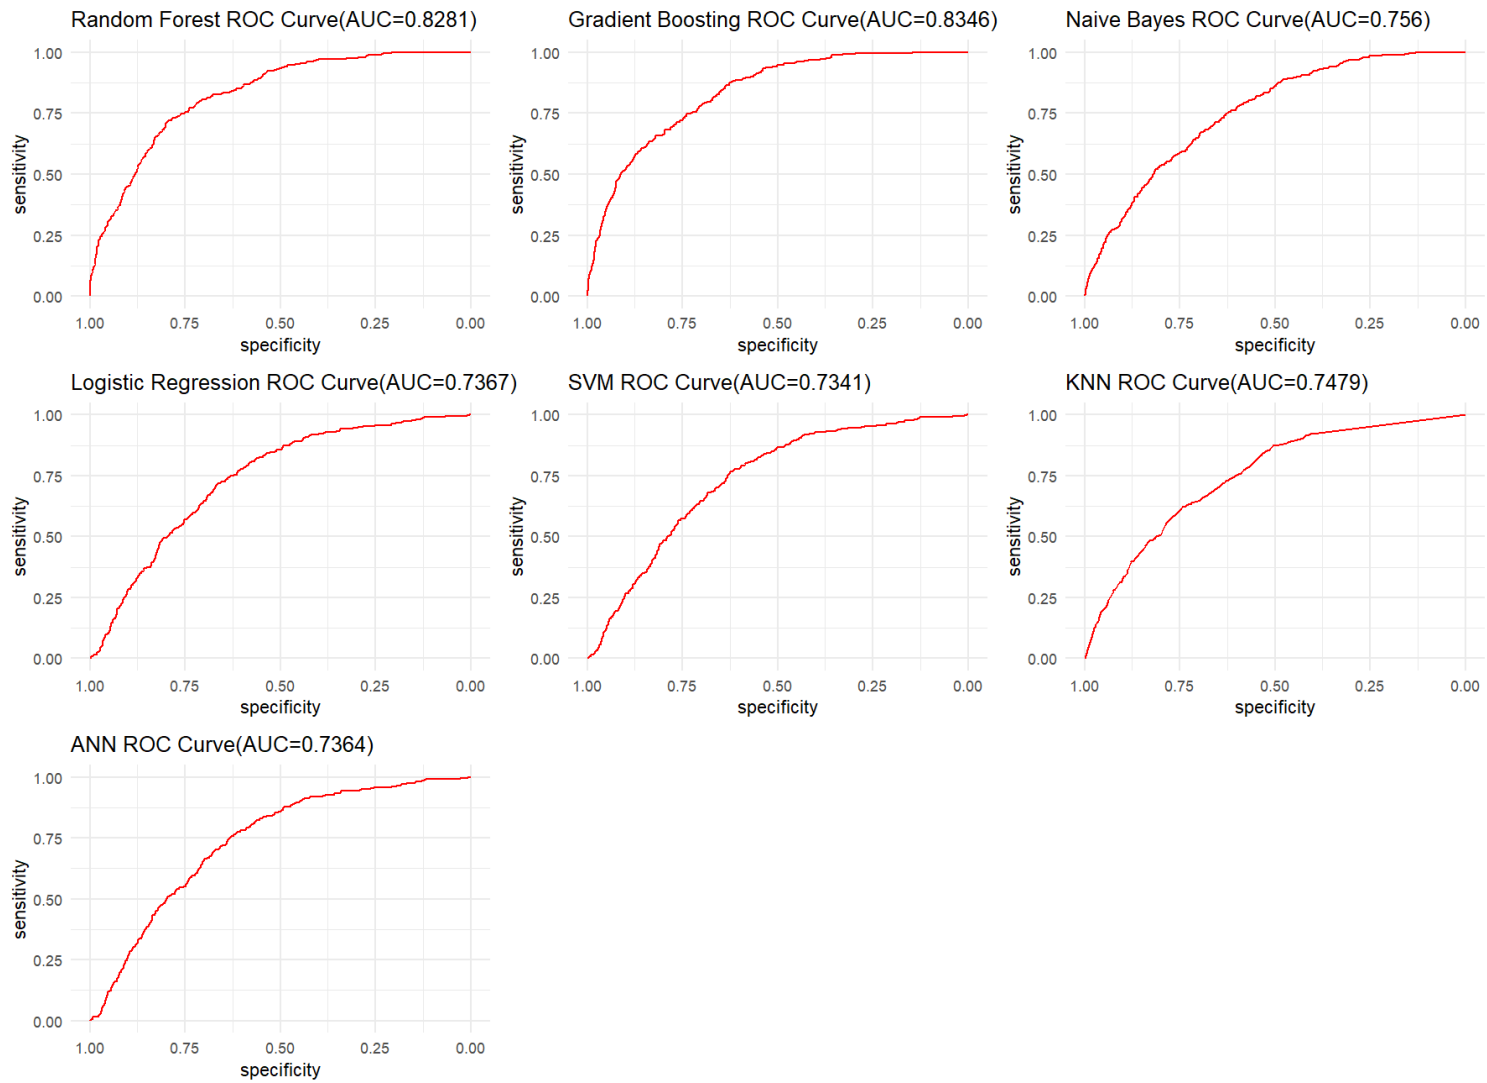

\*RF-Random Forest; GBM-Gradient Boosting; NB- Naïve Bayes; LR-Logistic Regression; SVM- Support vector machine; KNN-K-nearest neighbors; ANN-Artificial Neural Networks;  
 ROC-Receiver operating characteristic curve; AUC-Area under the curve

Figure S3. Receiver operating characteristic curve for linear growth faltering prediction models

Table S1. Statistical analysis comparing synthetic data tables to the original training dataset (n = 8,894)

|                  | <b>Snythetic Data</b> |               |
|------------------|-----------------------|---------------|
|                  | <b>n=8,894</b>        |               |
| <b>Variables</b> | <b>pMSE</b>           | <b>S_pMSE</b> |
| lgf              | 0.0000010             | 0.820503      |
| age              | 0.0000030             | 0.743468      |
| temperature      | 0.0000050             | 1.228149      |
| resp_rate        | 0.0000040             | 0.947305      |
| SAM              | 0.0000020             | 1.659631      |
| Rotavirus_vacc   | 0.0000020             | 1.131343      |
| cur_wrinkledskin | 0.0000010             | 0.779434      |

pMSE- propensity score mean-squared-error; S\_pMSE- standardized ration of propensity score mean-squared error.

Table S2. Model performance of linear growth faltering<sup>β</sup> prediction models using combined data

| Algorithm | Sensitivity % [95% CI] | Specificity % [95% CI] | PPV % [95% CI]   | NPV % [95% CI]   | F1-Score [95% CI] | AUC % [95% CI]   | PRAUC % [95% CI] |
|-----------|------------------------|------------------------|------------------|------------------|-------------------|------------------|------------------|
| RF        | 73.1 [71.1-75.1]       | 76.6 [73.1-79.9]       | 90.5 [88.9-91.9] | 48.5 [45.3-51.6] | 80.9 [65.2-97.0]  | 82.4 [80.5-84.2] | 62.6 [59.4-65.8] |
| GBM       | 71.2 [69.0-73.2]       | 72.4 [68.7-75.9]       | 88.7 [87.0-90.2] | 45.3 [42.2-48.5] | 80.4 [76.6-96.4]  | 78.0 [76.0-80.1] | 53.0 [50.2-55.5] |
| NB        | 66.0 [63.9-68.2]       | 53.2 [49.2-57.2]       | 81.1 [79.0-83.0] | 34.1 [31.1-37.2] | 72.8 [58.3-85.8]  | 62.2 [59.7-64.7] | 34.3 [32.8-36.6] |
| LR        | 56.9 [54.7-59.2]       | 54.0 [50.0-58.0]       | 79.0 [76.7-81.1] | 29.3 [26.7-32.0] | 64.9 [50.1-89.9]  | 56.9 [54.3-59.5] | 29.0 [26.5-31.9] |
| SVM       | 58.5 [56.3-60.8]       | 60.0 [56.0-63.9]       | 81.6 [79.4-83.6] | 32.3 [29.6-35.1] | 68.2 [62.2-94.3]  | 62.9 [60.4-65.4] | 35.6 [32.3-39.0] |
| KNN       | 65.0 [62.8-67.1]       | 73.7 [70.1-77.1]       | 88.2 [86.4-89.9] | 41.0 [38.1-43.9] | 74.8 [59.9-97.0]  | 77.3 [75.2-79.4] | 54.0 [51.2-57.3] |
| ANN       | 45.8 [43.6-48.1]       | 65.8 [61.9-69.5]       | 80.2 [77.7-82.6] | 28.6 [26.3-31.0] | 58.3 [43.6-85.4]  | 58.0 [55.5-60.6] | 31.0 [29.1-32.8] |

<sup>β</sup>- Linear growth faltering defined as negative change in linear growth

\*RF-Random Forest; GBM-Gradient Boosting; NB- Naïve Bayes; LR-Logistic Regression; SVM- Support vector machine; KNN-K-nearest neighbors; ANN-Artificial Neural Networks; 95% CI- 95% Confidence Interval; PPV- Positive Predictive Value; NPV- Negative Predictive Value; AUC- Area under the Curve; PRAUC- Precision Recall Area under the Curve
